# Supplementary material for: Anchoring ultrasmall Pd nanoparticles by bipyridine functional covalent organic frameworks for semihydrogenation of acetylene
Source: Royal Society of Chemistry journal article supplement (doi:10.1039/d3ra03552b), 2023-01-01
Supplement: d3ra03552b1.pdf [file d3ra03552b1.pdf]

## Supporting Information

### Anchoring Ultrasmall Pd Nanoparticles by Bipyridine Functional Covalent Organic Frameworks for Semihydrogenation of Acetylene

Ji-qiu Zhang<sup>1</sup>, Yu-Hao Wang<sup>1</sup>, Shu-jing Zhang<sup>1</sup>, Yang-qian Lin<sup>1</sup>, Qing-qing Guan<sup>2</sup>, Xi-meng Xu<sup>1\*</sup>

<sup>1</sup>Faculty of Civil Engineering and Mechanics, Kunming University of Science and Technology, Kunming 650500, PR China.

<sup>2</sup>School of Chemical Engineering and Technology, Xinjiang University, Urumqi, Xinjiang 830046, PR China.

**Table S1** Experimental conditions for the synthesis of TbBpy in different solvents.

| Serial number | Solvent type and amount | Other synthesis conditions                                                                                                                                                       |
|---------------|-------------------------|----------------------------------------------------------------------------------------------------------------------------------------------------------------------------------|
| 1             | Dioxane, 2 ml           | 0.2 mmol of 1,3,5-tribenzaldehyde; 0.3 mmol of 5,5-diamino-2,2-bipyridine; 0.4 ml of acetic acid aqueous solution (3 mol/L); temperature of 120°C; synthesis time It takes 72 h. |
| 2             | N-butanol, 2 ml         |                                                                                                                                                                                  |
| 3             | Mesitylene, 2 ml        |                                                                                                                                                                                  |
| 4             | Ethanol, 2 ml           |                                                                                                                                                                                  |

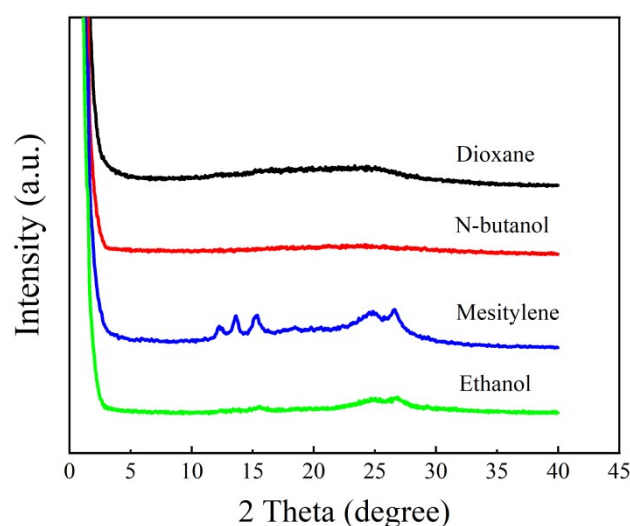

**Figure S1.** XRD patterns of TbBpy synthesized in 4 different solvents.

**Table S2** Experimental conditions for the synthesis of TbBpy in ethanol/mesitylene with different volume ratio.

| Serial number | Solvent ratio and dosage | Other synthesis conditions |
|---------------|--------------------------|----------------------------|
|---------------|--------------------------|----------------------------|

|   |                             |                                                                                                                                                                              |
|---|-----------------------------|------------------------------------------------------------------------------------------------------------------------------------------------------------------------------|
| 1 | Ethanol/Mesitylene=4:1,2 ml | 0.2 mmol of 1,3,5-tribenzaldehyde; 0.3 mmol of 5,5-diamino-2,2-bipyridine; 0.4 ml of acetic acid aqueous solution (3 mol/L); temperature of 120 °C; synthesis time for 72 h. |
| 2 | Ethanol/Mesitylene=1:1,2 ml |                                                                                                                                                                              |
| 3 | Ethanol/Mesitylene=1:4,2 ml |                                                                                                                                                                              |

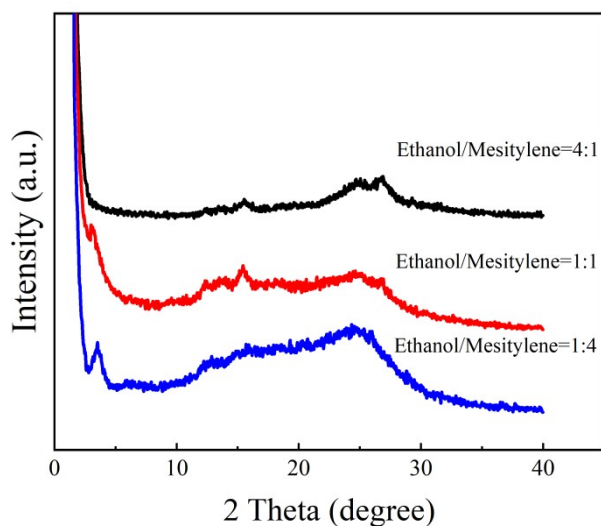

**Figure S2.** XRD patterns of TbBpy synthesized in ethanol/mesitylene with different volume ratios.

**Table S3** Experimental conditions for synthesizing TbBpy with different concentrations of acetic acid aqueous solution.

| Serial number | Concentration and dosage of acetic acid aqueous solution | Other synthesis conditions                                                                                                                                                                |
|---------------|----------------------------------------------------------|-------------------------------------------------------------------------------------------------------------------------------------------------------------------------------------------|
| 1             | 6 mol/L, 0.4 ml                                          | 0.2 mmol of 1,3,5-tribenzaldehyde; 0.3mmol of 5,5-diamino-2,2-bipyridine; ethanol/mesitylene mixed solvent with a volume ratio of 1:4; temperature is 120 °C; The synthesis time is 72 h. |
| 2             | 9 mol/L, 0.4 ml                                          |                                                                                                                                                                                           |
| 3             | 12 mol/L, 0.4 ml                                         |                                                                                                                                                                                           |

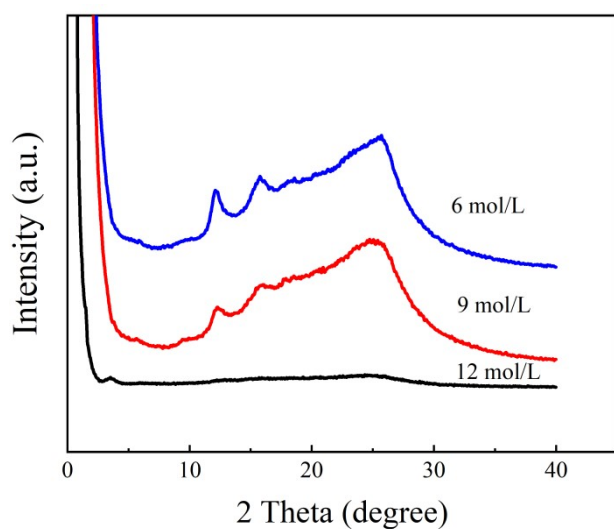

**Figure S3.** XRD patterns of TbBpy synthesized from 1: 4 volume ratio of ethanol/mesitylene mixed solvents with different concentrations of acetic acid solution.

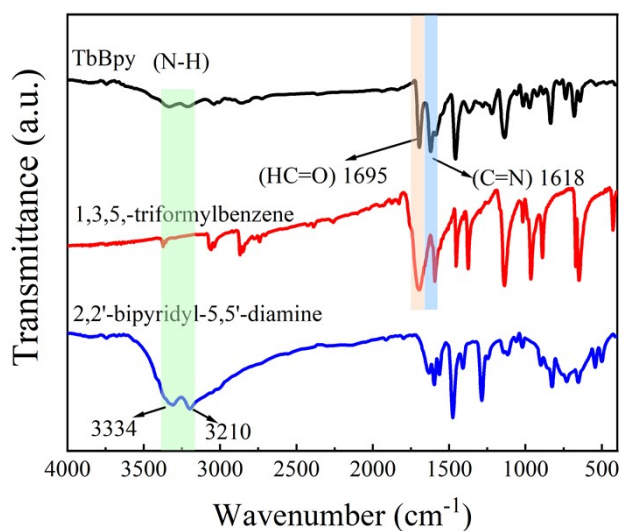

**Figure S4.** Infrared spectra of TbBpy, 1,3,5-triphenylaldehyde and 5,5-diamino-2,2-bipyridine.

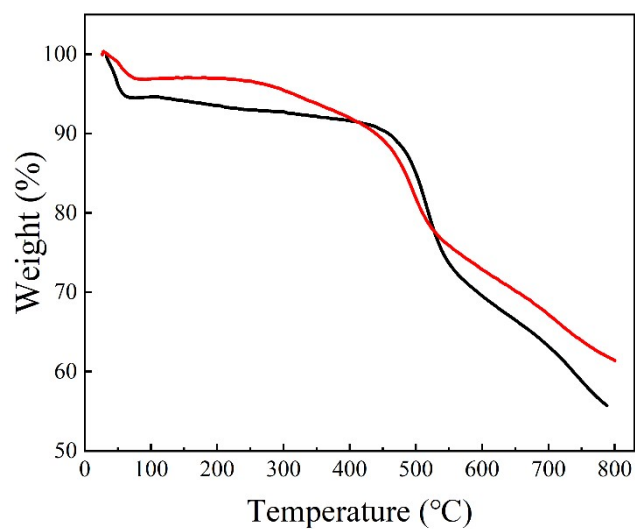

**Figure S5.** TGA curves of TbBpy (black) and Pd@TbBpy (red).

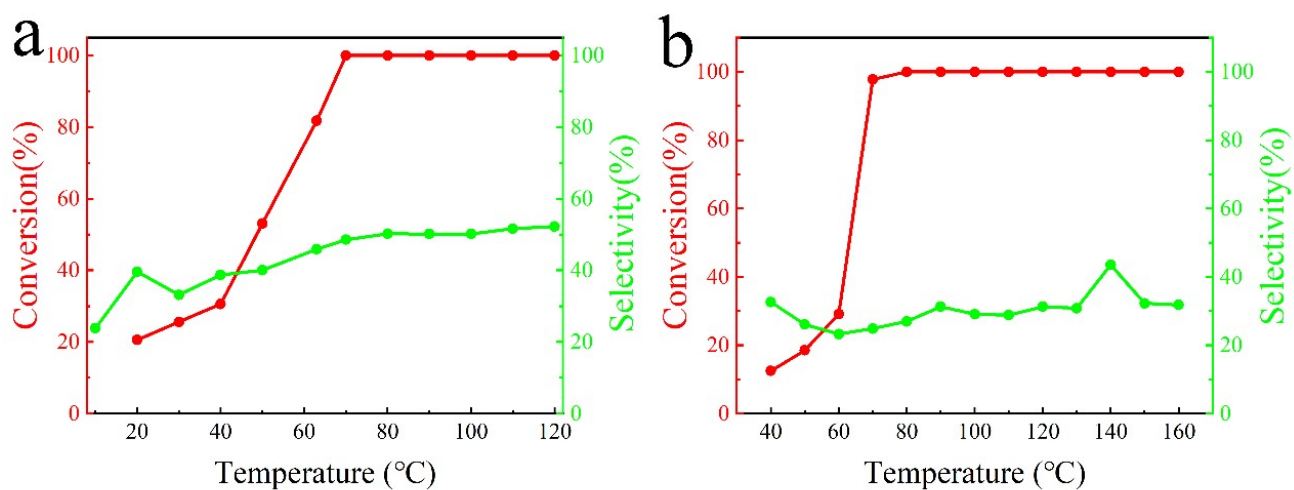

**Figure S6.** Catalytic activity of different reduction reactions: acetylene conversion (red) and ethylene selectivity (green) of (a) 1wt%Pd@TbBpy-NaBH<sub>4</sub> and (b) 1wt%Pd@TbBpy-H<sub>2</sub> at 40000 h<sup>-1</sup>.

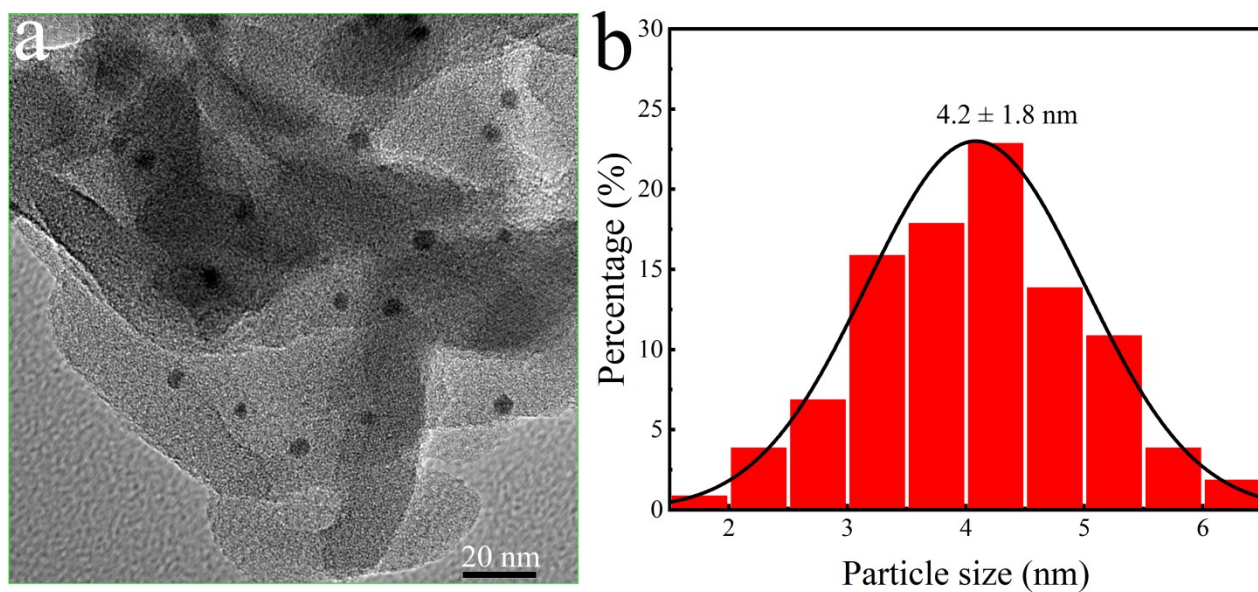

**Figure S7.** After catalytic testing: (a) HR-TEM images Pd@TbBpy and (b) the Pd particle size frequency distribution histogram.

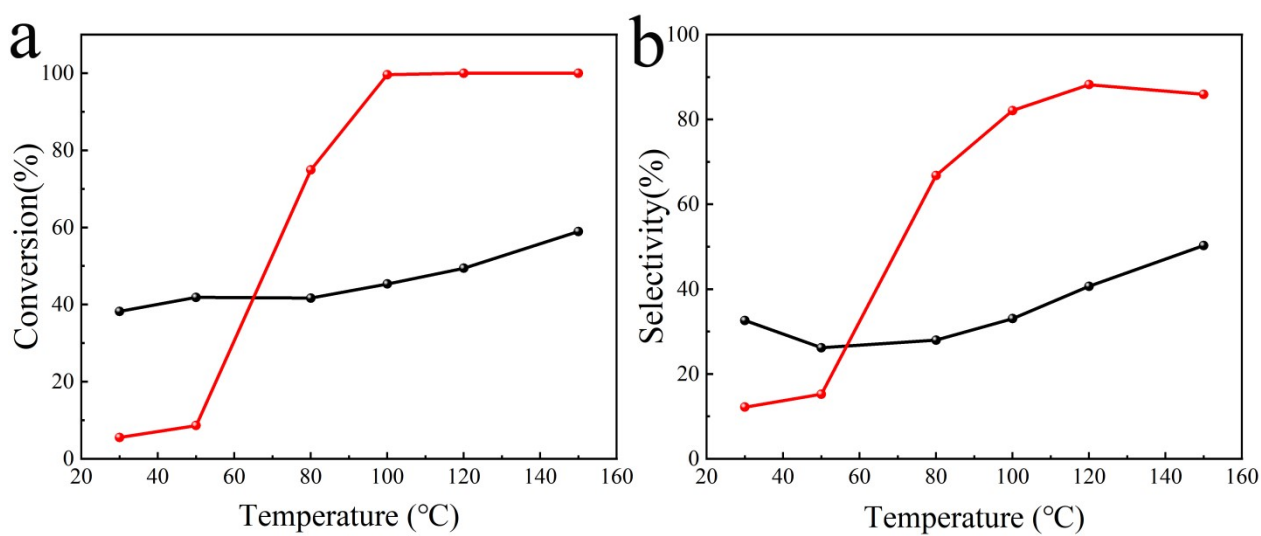

**Figure S8.** Catalytic activity of 0.75wt%Pd@TbBpy (red) and Pd salt (black) .

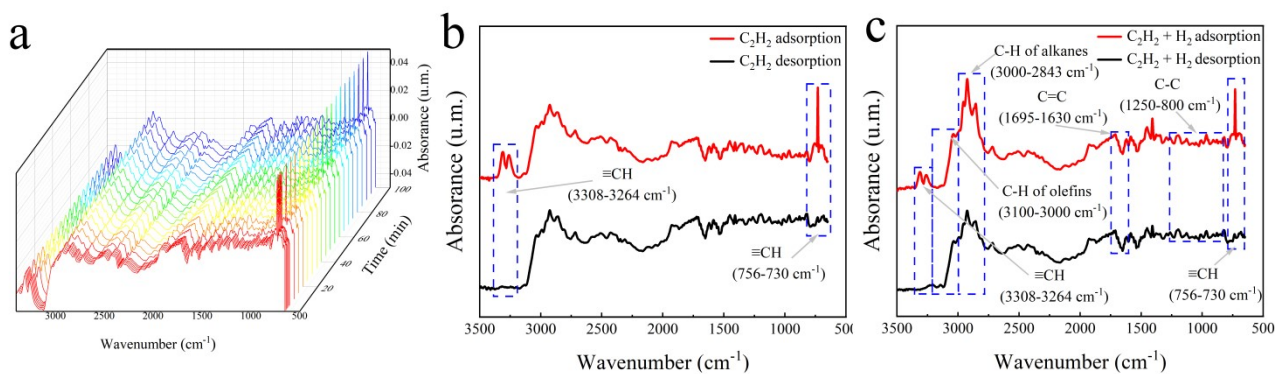

**Figure S9.** In situ DRIFTS spectra over a 0.75wt% Pd@TbBpy at 120°C: (a) The real-time in situ DRIFTS spectra of C<sub>2</sub>H<sub>2</sub> adsorption. (b) The adsorption and desorption spectra of C<sub>2</sub>H<sub>2</sub>. (c) The absorption and desorption spectra of C<sub>2</sub>H<sub>2</sub> hydrogenation.

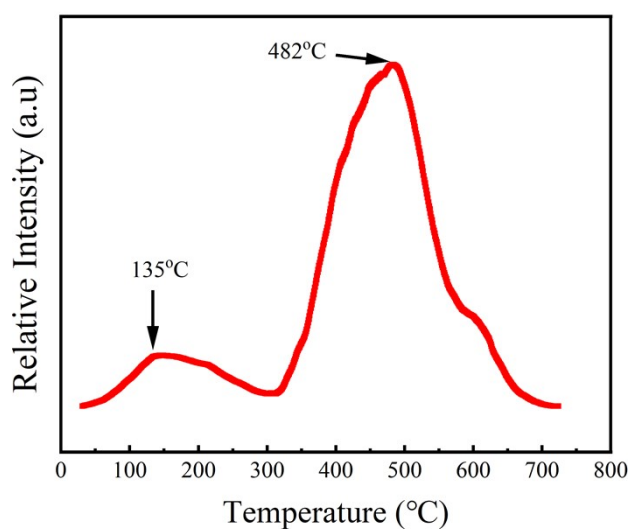

**Figure S10.** H<sub>2</sub>-TPD profiles of Pd@TbBpy catalyst.

**Table S4.** Conversion and Selectivity of acetylene hydrogenation for Pd-based catalyst.

| Catalyst                          | Pd loading, % /Size,nm | Tempure, °C | WHSV h <sup>-1</sup> | Conversion, % | Selectivity, % | Reference                   |
|-----------------------------------|------------------------|-------------|----------------------|---------------|----------------|-----------------------------|
| Pd@TbBpy                          | 0.75                   | 120         | 70000                | 100           | 88.2           | This work                   |
| Pd <sub>1</sub> /ND@G             | 0.11                   | 180         | 60000                | 100           | 90             | Huang et.al <sup>1</sup>    |
| Pd <sub>1</sub> /CeO <sub>2</sub> | 1                      | 160         | 90000                | 100           | 85%            | Guo et.al <sup>2</sup>      |
| Pd/MCN                            | 0.1                    | 120         | 33000                | ~90           | 84.3           | Dodangeh et.al <sup>3</sup> |
| Pd <sub>1</sub> /MgO-H100         | 0.16                   | 140         | 90000                | 100           | 70             | Guo et.al <sup>4</sup>      |
| Pd/CTS                            | 1                      | 90          | 90000                | 100           | ~90            | Guan et.al <sup>5</sup>     |

|                                                               |       |      |       |     |    |                          |
|---------------------------------------------------------------|-------|------|-------|-----|----|--------------------------|
| <b>Pd/SiC</b>                                                 | 0.80  | 100  | 30000 | 100 | 80 | Guo et.al <sup>6</sup>   |
| <b>Pd<sub>1</sub>/C<sub>3</sub>N<sub>4</sub></b>              | 3.5   | ~110 | 60000 | 99  | 83 | Huang et.al <sup>7</sup> |
| <b>Pd@NMC-850</b>                                             | 0.208 | 100  | 12000 | 66  | 83 | Wang et.al <sup>8</sup>  |
| <b>Pd/<math>\alpha</math>-Al<sub>2</sub>O<sub>3</sub>@SiC</b> | 0.035 | 130  | 10000 | 83  | 65 | Zhang et.al <sup>9</sup> |

## References

1. Huang F , Deng Y , Chen Y , et al. Atomically Dispersed Pd on Nanodiamond/Graphene Hybrid for Selective Hydrogenation of Acetylene[J]. Journal of the American Chemical Society, 2018, 140(41):13142-13146.
2. Guo Y , Li Y , Du X , et al. Pd single-atom catalysts derived from strong metal–support interaction for selective hydrogenation of acetylene[J]. Nano Research, 2022, 15:10037–10043.
3. Dodangeh F , Rashidi A , Aghaie H , et al. Synthesis of Novel Ag-modified Pd-supported Mesoporous Carbon Nitride for Selective Hydrogenation of Acetylene with an Excellence Ethylene Selectivity[J]. Journal of Physics and Chemistry of Solids, 2021, 158(2):110219.
4. Guo Y , Qi H , Su Y , et al. High Performance of Single-atom Catalyst Pd-1/MgO for Semi-hydrogenation of Acetylene to Ethylene in Excess Ethylene[J]. ChemNanoMat, 2021, 7(5):526-529.
5. Guan Q , Yang C , Wang S , et al. Reactive Metal-Biopolymer Interactions for Semihydrogenation of Acetylene[J]. ACS Catalysis, 2019, 9 (12), 11146-11152.
6. Guo Z , Liu Y , Liu Y , et al. Promising SiC support for Pd catalyst in selective hydrogenation of acetylene to ethylene[J]. Applied Surface Science, 2018, 442(1):736-741.
7. Huang X , Xia Y , Cao Y , et al. Enhancing both selectivity and coking-resistance of a single-atom Pd<sub>1</sub>/C<sub>3</sub>N<sub>4</sub> catalyst for acetylene hydrogenation[J]. Nano Research, 2017, 10(4):1-11.
8. Wang Q , Zhao J , Xu L , et al. Tuning electronic structure of palladium from wheat flour-derived N-doped mesoporous carbon for efficient selective hydrogenation of acetylene[J]. Applied Surface Science, 2021,562(1):150141.
9. Zhang H , Cao J L , Wu B , et al. An alumina-coated, egg-shell Pd/ $\alpha$ -Al<sub>2</sub>O<sub>3</sub>@SiC catalyst with enhanced ethylene selectivity in the selective hydrogenation of acetylene[J]. Rsc Advances, 2016,6, 57174-57182.
